# Supplementary material for: Virtual learning collaboratives to improve urine culturing and antibiotic prescribing in long-term care: controlled before-and-after study
Source: PubMed Central journal article supplement — BMJ Qual Saf. 2021 Apr 14;31(2):94–104. doi: 10.1136/bmjqs-2020-012226 (PMC8785008; doi:10.1136/bmjqs-2020-012226), 2021-04-14
Supplement: bmjqs-2020-012226supp004.pdf [file bmjqs-2020-012226supp004.pdf]

#### Supplement 4

The following data sources were used to support primary and secondary outcomes:

- i) the Continuing Care Reporting System Long Term Care (CCRS-LTC) database, which includes detailed quarterly assessments for all Ontario long-term care residents.
- ii) The Registered Persons Database (RPDB) for demographics and to facilitate linkages.
- iii) the Ontario Health Insurance Plan (OHIP) database, which includes physician billing claims for procedures performed within Ontario's universal single-payer healthcare system;
- iv) the Ontario Drug Benefit Program (ODB) database, which contains detailed information about drugs dispensed in the province to individuals over 65 years of age including residents of long-term care homes;
- v) the Canadian Institute for Health Information (CIHI) Quarterly Discharge Abstract database (DADQ), which contains detailed information about hospitalizations; and
- vi) the CIHI Quarterly National Ambulatory Care Reporting System (NACRSQ) database, which describes all emergency department visits.
